# Supplementary material
Source: MDPI journal article supplement (https://www.mdpi.com/2072-4292/13/24/5157)
Supplement: s1 [file s1]

**libRadTran input parameters used in simulations to obtain the effective wavelength**

| Input parameters    | Range       | Step |
|---------------------|-------------|------|
| Latitude            | 39.507081   | -    |
| Longitude           | -0.420269   | -    |
| Altitude            | 40          | -    |
| SZA                 | 10° - 80°   | 10°  |
| Angstrom exponent   | 0.2 - 1.8   | 0.4  |
| AOD at 1μm          | 0.01 - 0.21 | 0.05 |
| Asymmetry parameter | 0.7         | -    |
| SSA                 | 0.9         | -    |
| TOC (DU)            | 300         | -    |

**Input parameters of RTM simulations used in the radiative calibration\***

| Parameters          | Values                                  | Data source |
|---------------------|-----------------------------------------|-------------|
| Latitude            | 39.507081                               | BASS        |
| Longitude           | -0.420269                               | BASS        |
| Altitude            | 40 m                                    | BASS        |
| Wavelengths (nm)    | 480, 541, 615 (B, G, R)                 | (own calcs) |
| SZA                 | 20 to 80° (step 0.5°)                   | -           |
| Atmosphere          | Midlatitude Summer                      | libRadtran  |
| Surface Albedo      | 0.09, 0.11, 0.13 (B, G, R)              | AERONET     |
| TOC                 | 287-359 DU                              | AERONET     |
| CWV                 | 6- 38 mm                                | AERONET     |
| SSA                 | 0.78 -1 (B, G, R)                       | AERONET     |
| Asymmetry parameter | 0.60-0.79,0.59-0.78,0.57-0.77 (B, G, R) | AERONET     |
| AOD 500 nm          | 0.02-0.41                               | AERONET     |

\* The spectral parameters are separated with colons, and ordered as the Blue, Green, Red (B, G, R).
